# Supplementary material for: Managing Osteoporosis: A Survey of Knowledge, Attitudes and Practices among Primary Care Physicians in Israel
Source: PLoS One. 2016 Aug 5;11(8):e0160661. doi: 10.1371/journal.pone.0160661 (PMC4975485; doi:10.1371/journal.pone.0160661)
Supplement: S2 Fig — (XLSX) [file pone.0160661.s002.xlsx]

## Sheet: Sheet1
number	q1a	q1b	q1c	q1d	q1e	q1f	q2a	q2b	q2c	q2d	q3a	q3b	q3c	q3d	q3e	q3f		q4a	q4b	q4c	q4d	q4e	q4f	q4g	q4h	q4i	q5	q6	q7	q8	q9a	q9b	q9c	q9d	q9e	q9f	q10	q11	q12a	q12b	q12c	q12d	q12e	q12f	q13a	q13b	q13c	q13d	q13e
q1	yes	yes	no	no	yes	no	no	yes	no	yes	yes	yes	yes	yes	yes	yes		yes	yes	yes	no	yes	yes	no	no	yes	E	B	C	B	1	1	2	1	1	1	E	C	3,4,5,6	1,10	9	3,4,5,6	2,7	3,8	yes	no	no	yes	no
	1	1			0		0	0		1	1	0	1	1	1	1		1	0	0		0	1			1	1	1	0	0	0	1	0	0	0	0	0	0	1	0	0	1	0	0	0	0	0	0	0
	0	1		0	0			1		0	1	1	1	1	1	1		1	0	0		0	0		0	0	0	0	1	1	1	0	1	1	1	1	0	1	1	1	0	1	0	1	0			1
	0	1			0			0	0	1	1	1	0	1	0	0		1	0	0		0	1			0	1	0	0	0							0	0	1	1		0	0	0	1			0
	1	1			0	0		1		0	1	0	1	0	1	0		1	1	0		1	0			0	0	0	1	1	1	0	1	1	0	0	0	0	1	1	0	0	0					1
							0	0	0	0	0	0	1	0	1	0		1	0	0	0	0	0			1	1	1	0	0	1	0	0	0	0	0	1	0		0						0
	0	1		0	0			1		1	0	0	0	0	1	1		1	0	1		1	0			0	0	1	0	0								0	1	1	0		0	0	0			1
	1	1			0			0		1	1	1	1	0	1	1		1	0	0		0	0			0	1	0	1	1	0	1	0	0	0	0	0	0	0			0			1			1
	0	1			0			1		1	1	0	1	0	0	1		0	0	1		0	0			0	0	0	0	0								0	0	0	0		0	0	0
	1	1			0			0		0	1	1	1	1	1	0		1	0	0		0	1	0		1	0	1	0	1							0	0	1	0	0							0
	0	1	0		0			1		1	0	1	0	0	0	0		1	0	0		0	0			0	1	0	0	1	1	0		1	0	1	0	0				0	0			0
	1	1			0		0	1		0	0	0	0	1	1	0		0	0	0		0	0			0	0	1	1	0							0	0	0	0	0	1	0	0	1
	0	1		0	0			0		1	1	1	1	1	1	1											1	0	0	0	1	1	0	1	1	1	0	0	1	1	0	1	0	1	0			1
	1	0			0			0		0	1	0	0	0	1	0		1	0	0		0	0			0	1	1	0	1	1	1	0	0	0	1	0	0		1	0				0
	0	1		0	0	0		0		1	1	1	1	0	0	1		1	0	0		0	0			0	0	0	0	1							1		0	1	0	0	0	0	1			1
	1	1			0			1		1	1	1	1	0	1	1		1	0	0		0	0			0	1	1	1	1	1	0	0	1	0	1	0	1	1			1						1
	0	1			1		0	0		0	0	0	1	1	1	0		1	1	0		0	1			0	0	0	0	0	1	1	0	1	0	0	0	0	0	1
	0	1		0	0			1		0	0	0	0	0	1	1		1	0	0		0	1			0	1	0	0	0							0	0	1	1	0	1	0	0	0			1
	1	1			0			1		1	0	0	0	0	1	0		1	0	0	0	0	0			1	0	1	1	1	1	0	0	1	0	1	0	1										1
	0	1			0			0	0	0	0	0	0	0	1	0		1	0	1		0	0		0	0	1	0	0								1	0	0	1		0			0
	1	1			0			1		0	0	1	1	0	0	0		0	0	0		0	0			1	0	0	1	0	1	1	0	1	0	0	1	0	1	0	0	1	0	0	0			0
	0	1	0		0			0		1	1	0	0	1	1	0		1	0	0		1	0			0	0	1	0	0	1	1	0	1			0	1							0
	0	0		0	0			1		0	0	1	1	0	1	0		1	1	0		0	0			0	1	0	0								0	0	0			0	0	0	0			1
	1	0			0	0		0		0	1	0	0	0	1	0		1	0	0		1	0			0	0	1	1	0	1	0	1	0	1	0	1	1	1	1	0	1						1
	0	1	0		1			0		1	0	1	0	0	1	0		1	0	0		0	1			1	0	1	0	0	1	0	1	0	0	1		0	1	1		1	0	0	0			1
											1	0	0	0	1	1		1	0	0		1	0			0	1	1	0	1							0	0	1									1
	0	1			0			0	0	0	0	1	1	0	1	0		1	0	0		0	0			0	0	0	0	1	1		0	1	0	1	0	0	1	1	1	1	0	0	0			1
	1	1			0		0	0		0	1	0	0	0	1	0		1	0	0		0	0			0	0	1	1	0	1	1					1		1	1		1	0	0	1
	1	1		0	1			0		1	0	0	0	1	1	0		1	0	0		1	0			0	1	0	0	1	1	0	0	1			0	0	0	1		0	1	0	0			1
	0	1			0			1		1	0	0	1	0	0	0		1	0	0		0	1			1	0	1	0	1							0	0	1									1
	1	1			0			0		0	0	1	0	0	1	1		0	0	0		0	0			0	1	0	1	0	1	0	1	1	0	0	0	1	0	0	0	0	0	0	0			0
	0	1		0	0			1		0	0	0	1	1	1	0		0	0	0		0	0			0	0	0	1	0							0	0	0
	1	1			0			1		0	1	0	0	0	1	1		0	0	0		0	0			0	1	1	0	1	1	1	0	1	0	0	0	0	1	0	0		0	0	1			1
	0	1	0		0			1		1	1	0	1	1	1	1		0	0	0		0	0			0	0	1	0	0	0	1	0	1			0	1	1	1	0
								1		1	1	1	0	0	1	1		1	0	0	0	0	0			0	1	1	0	0	0	0	0	0	0	1	0	1	1	1					0			1
	0	1		0	0			0		0	1	0	1	1	1	0		0	1	0		0	1			1		0	1	1								0	1	0	0	1	0	0	0			1
	1	1	0	0	0			0		1	0	0	0	0	1	0		0	0	1		0	0			0	1	0	0	0	1	0	0	1	0	0		0	1	1		1						0
	0	1			0			0		1	1	0	0	0	1	1		0	0	0		1	0			1	0	0	0	0	1	0	0	1	1	0	0	0	0	0	0	0	0	0	1
	1	1		0	1			1		0	1	0	0	0	1	0		0	0	0		0	1			1		0	1	0	1	0	0	1	1	0	0	1	1	1	0		0	0	0			1
	1	1			0			0	0	0	1	0	0	0	1	1		1	0	1		0	0	0		1	0	1	0	1	0	1	1	1	1	1	0	0	1	0								0
	0	1			0	0		0		0	0	1	1	1	1	0		1	1	0		0	1			1	1	0	1	0								0	1	1		1	0	0	1			1
	0	1			0			1		1	1	0	0	0	1	0		1	0	0	0	0	0			0	0	1	0	0	1	1	1	1	0	0	0	1	1	0								0
	1	1			0		0	0		0	1	0	0	0	1	0		0	0	0		0	1			0	0	0	1	1							0	1	0		0	0	0	0	0			1
	0	1			0			1		1	0	1	0	0	0	0		1	0	0		1	0			0	1	1		1	1	1	1	1	1	1	0	0	0	0		0	0	0	0			0
	0	1	0		0			1		0	0	1	0	0	1	0		0	0	0		0	0			0	0	0	0	0							0	0	1	1	0				1
	0	1		0	0	0		0		1	0	1	1	0	1	0		1	0	0		0	0			1	0	1	1	0	1	0	0	1	0	0		1	0	1		0	0	0	0			1
	1	1			0			0		0	0	1	0	0	1	0		1	0	0	0	0	0			0	1	0	0	1							1	1	1	1		1	0		1			0
					0			1	0	0	0	0	0	1	1	0		1	0	1		0	0			0	0	0	1	0	1	1	1	1	0	1	0	0										1
	0	1			0		0	0		1	1	1	1	0	1	1		1	0	0		0	1		0	0	0	0	0	1							0	0	1	1		1	0		0
	0	1			0			1		1	1	1	1	1	1	0		0	1	0		1	0			0	1	1	0	1	1	1	0	1	0	0		0	1		0	1	0		1			1
	0	1			1		0	0		1	0	0	1	0	1	1		1	0	0		0	1	0		0	0	0	1	0							1	1	1	0					0			0
	1	1		0	0			1		0	1	1	0	1	1	0		1	0	0		0	0			0	1	0	0	0	1	1	0	1	0	1		0	1	0		0						0
	0	1		0	1			0		0	0	1	0	1	1	0		1	0	1		0	0			0	0	1	1	1	1	1	0	1			0	0	1	1	0	0	0	0	0
	1	1			1			0		1	1	0	0	1	0	0		1	0	0		0	0			0	0	0	0	0	0	0	1	0	1	1	0	0	1	1		0	0		0			1
	0	1			0			0		1	1	0	0	0	1	0		1	0	0		0	0			0	1	0	0	1								1	1			1
	1	1			0			0		0	1	0	0	1	0	1		1	0	0		0	0			1	0	0	1	0	1	0	0	0	0	1	0	0	0			0						0
	0	1			1		0	1		0	0	0	1	1	1	1		1	0	0		0	0			1	0	1	0	0	1	0	0	1	0	0	1		0	0	0	0	0	0	0
	1	1			0			1	0	1	0	0	0	1	1	1		1	0	1		0	0			0	1	0	0	1								0	1			1						1
	1	1		0	0			0		0	0	1	0	0	1	0		1	0	1		0	0			1	0	1		0	1	1	1	0	0	0	0	0		1	0		0	0	0			1
	0	1	0		1			1		0	1	1	1	1	1	1		0	0	1		0	1			0	0	1	0	0							1	0	1			1	0	0	1
	1	0		0	0			0		1	1	0	0	0	1	0		1	0	0		0	0			0		0	0	1	0	0	0	0	1	1	1	0										1
	0	1			1			1		0	1	0	0	1	1	1		1	0	0		0	0			0	0	1	0	1	1	0	0	1	0	0		0	1	0	0
	1	1			1	0		0		0	1	0	1	0	1	1		1	0	0		0	0			0	1	0	0	0							0	1	1	1	0		0	0	0			1
	1	1	0	0	0			0		1	1	1	1	1	1	1		1	1	0	0	0	0			1	0	0	1	1	1	1	0	1	0		0	0	1	1		1	0		0			1
	0	1	0	0	0			0		0	0	1	1	0	1	1		1	0	0		1	1			0	1	0	0	1	1	0	1	1	0	0	1	0	0	1	1	0			1
	1	1			0	0		0		0	1	1	1	1	1	1		1	0	0		0	1			0	0	0	0	0							0	0	1	0	1	1	0		0			1
	1	1			1	0	0	1		0	0	1	1	0	1	0		1	0	0		0	1			0		1		1	1	0	1	1	0	0		0		0	0				0			0
					0			1		1	1	0	1	1	1	0		1	0	0		0	0			0	1	0	0	0	1	1	0	1				0	1	1		1
	0	1			1			0		1	1	0	1	1	1	1		0	1	1		0	1			0	0	0	1	1	1	1	1	0	0	1	1	0	1			0						1
	1	1			0			0		0	1	0	1	0	0	0		1	1	0		0	0			0	0	1	0									0	1	0		1	0	0	1			1
	0	0			1			0		0	1	1	0	0	1	1		1	1	0		0	0			0	0	0	0	0	1	1	0	0	0	1	0	1	1	0	0							1
	1	1			0			0		1	1	1	1	1	1	0		1	0	0		0	0			0	1	1	1		0	0	1	0	1	1	1	0	0	1	0	0	0	0	0
	1	1	0		1			1	0	1	1	1	1	1	1	1		0	1	1		0	0			0	0	0	0	0	1	0	1	1	0	1	0	1	0	1		0	0		1			1
	1	1			0			1		0	0	0	1	1	1	0		1	0	1		0	0			0	0	0	0	0								0	1	1		0						0
	0	1			0			0		0	0	0	0	1	1	1		1	0	1		1	0			0		0	0	1	1	1	0	1	0	0	0	1	1	0	0	1	0	0	0			1
	0	1			0			0		1	1	1	1	1	1	1		1	0	1		0	0			1	0	1	1	0	1	0	1	1	0	1	1	0	1	1		1			0
	1	1			0			1		1	1	0	1	1	1	1											0	1	0	0							0	1	1	0					1			1
	0	1			1	0	0	1		0	1	1	1	1	1	1		1	0	0	0	0	0			1	0		1	0	1	0	1	0	0	0	0	0	1	0	0	1	0	0	0			1
	0	1			0			0		1	1	0	1	1	0	1		1	1	0		0	1			1	1	0	0	1	1	0	1	1	0	1	0	0	0	1		0			0
	1	1			0			1		0	1	0	1	1	1	1		1	0	0		0	1			0	0	1	1	0	1	0	0	1	0	0	0	0	1	1		1	0	1	1			1
	1	1		0	0			0		1	0	0	1	1	1	1		1	1	1		0	1		0	1	0	1	0	0	0	1	1					1	0	0		0	0		0			1
	1	1			1			1		0	0	0	1	1	1	0		1	1	0		0	0			1	1	1		1	1	0	1	0		1	1	1	1	1		1	0	0	0			1
	0	1			0			0		0	1	0	1	0	1	1		1	0	1		1	1			0	0	0	0	0									0			0						0
				0	1			0		1	1	1	1	1	1	0		1	0	0		0	0			0		0	0	0	1	1	0	0		0	0	0	1									1
	0	1	0		0			1		0	1	0	1	1	1	1		1	0	1		0	0			0	0	0	1	1							0	0	1						0
	1	1			1			0		1	1	0	1	1	1	0		1	0	0		1	1			0	0	1	0	0	1	0	0	1		1	1	0	0	1	0	0	0	0	1			1
	0	1			0			0		0	1	0	1	0	1	1		1	0	0	0	0	0			0	1	0	0	0	1	1	0	1		0		1	1	1	0	1	0	0	0
	1	1			1			1		0	1	1	1	1	1	1		0	0	0		1	0			0	0	0	0	1	1	0	0	0		1		0										1
	0	1			0	0		1		0	1	0	0	1	1	0		1	1	0		0	0			1	1	0	0	0							0	0	1	1	0	1	0	1	0			1
	0	1			0			0		1	1	1	1	1	1	1		0	1	0		0	0	0		0	0	1	1	0	0	0	1	0	1	1	0	1	1	0		1	0	1	0			1
	1	1			1			0	0	0	0	0	1	1	1	1		1	1	0		0	0			0	1	1	0	1	1	1	0	1	0	0	1	1	1	0	0	1			0
	0	0			0			0		1	0	0	1	0	1	1		0	0	0		0	1			0	1	1	0	0	1	0	0	1	0	1	1	0										0
	1	0			0			1		0	1	0	1	1	0	1		0	1	1		1	0			1	0	1	1	0	1	1	1	0	0	0	0	1	1						1
	0	1			0			1		0	1	0	1	1	1	1		0	1	0		0	0			0	1	1	0	1								0	1	1	0	1	0	0	0			1
	0	1			1			1		1	1	1	1	1	1	1		0	1	0		0	0			0	0	0	0	0							1		1						0			1
					0			0		1	1	0	1	1	1	0		0	1	0		0	0			0	0	0	1	0	1	0	0	1	0	1	0		1	1	0	1	0	1	1			0
	1	1			1			0		0	0	1	0	0	1	1		1	0	0		1	0			0	1	1	0	1								0	0
	1	1			0			0		1	1	0	1	1	1	1		0	1	1		0	1			0	0		1	0	0	1	1	0	0	0	0	1	1	0		1						1
	1	1			0			1		0	0	0	1	1	1	1		1	1	0		0	0			0	1	1	1	1									0	0	0	0	0	0	0			1
	0	1	0		0			1		1	1	0	1	1	1	0		1	1	0		0	0			0	0	0	0	0	1	1	0	1	1	1	0	1	1						1			0
					1			0		0	0	1	1	0	1	1		0	0	0	0	0	0			0	0	1		1	1	1	0	1	0	0	0	0	1						0
	0	1		0	1		0	1		0	1	0	1	1	1	1		1	1	1		0	1			0	1	1	1	0							0	0	1	1	0	1	0	0	1			1
	1	1		0	0			1		0	1	1	1	1	1	0		1	1	0		1	0			1	0	0	1	1	1	1	1	1	0	0	1	0	1	0	0	1	0	0	0			0
	0	1			0			0		1	1	0	1	1	1	1		0	1	1		0	0			0	1	0	0	0								1							0
	0	1			0			0		0	1	0	1	1	1	0		1	0	0		0	0			0	1	1	1	0	1	0	0	0	0	1	1	0	1	1	0	1	0	1	0			1
	1	1		0	0	0		0		1	1	0	0	1	0	1		1	1	0		0	0			0	1	0	1	0							0	0	1						1			0
	1	0			1			1		0	1	0	1	1	1	1		1	0	1		1	0			0		0	1	1	1	0	1	1	0	0		1										1
	0	1			1			0	0	0	0	1	1	1	1	1		1	1	1		0	1			0	1	0	0	0								1	1	0	0	1	0	0	0			0
	0	1			1			1		1	1	1	1	1	1	0		1	1	1		0	0			1	0	0	1	1	1	1	0	0	0	0		0	0	1		0	0		0
	1	1			1			0		1	1	1	1	1	1	0		0	1	1		0	0			1	0	0		0	1	1	1	1	0	1	0	1							0			1
	0	1			0			1		1	0	0	1	1	1	0		1	1	0		0	0			0	0	0	0	1							0	0	1	0	0	1	0	1	1			0
	1	0			0			1	0	1	1	0	1	1	1	1		1	0	0		1	0			1	0	0	1	0	1	1	0	1	0	0	0		1	1	1	1	0	0	0			1
	0	1			1			0		1	1	0		0	1	1		1	1	1		0	0			1	0	1	0	1	1	0	0	1	0	1	1	0	1	1	1	1	0	0				1
	1	1		0	0			0		0	0	1	1	0	1	0		0	1	1	0	0	0			1	1	1	0	0									1	1	0	0	0	0	0			1
	1	1			0			0	0	1	1	0	1	0	1	1		1	1	1		1	0			0	0	0	0	0	1	1	1	1	0	1	0								0			1
	1	1			1			1		0	1	1	1	1	1	1		1	0	0		0	1			1	0	1	0	1	1	1	0	1	0	0	1	0	1	0	1	1	0	0	1
	1	1	0		0		0	0		1	1	0	1	1	1	0		1	1	0		0	0			1	1	0	0	0								0	1	0	0	1	0	0	0			1
	1	1			1			1		0	1	0	1	1	1	1		1	0	0		1	0			0	0	0	1	1	0	0	1	0	0	1	0	0
	0	1			0	0		1		1	1	1	0	1	1	1		1	1	1		0	1			1	0	0	0	0	1	0	1	1	0	1		0	1	1	1	1	0	0	0
	1	1			1			0		0	0	1	0	1	1	1		1	0	1		1	0			1	1	0	0	0								0	1	0		1			0			0
	0	1			0	0		0		0	1	0	1	1	0	0		1	1	1		1	0			1	0	1	1	0	0	1	1	0	1	1	0	1	0	1	0				1			1
	1	1			1			1		0	0	0	0	1	1	1		1	1	0		0	0			0	0	0	0	1								0	1	1					0
	0	1			1						0	1	1	0	1	1		0	0	0		0	0			0		1	1	0	1	0	0	1	0	1	0		1	1	0	1	0	1	0			0
	1	1			1			0		0	0	0	1	1	1	1		1	1	0		0	0			0	1	0	0	1								1	1	0
								1		1	0	1	0	1	1	1		1	0	0		0	0			0	0	0	0	0	1	1	0	0	1	1	0	1	1			1	0	0	1			1
	1	1			0			1		1	1	0	1	0	1	1		1	11	1		0	1			0	0	1	0	0							1								0
	0	0			1		0	1		0	0	0	0	1	1	1		1	1	1		1	1			1	0	0	0	1	0	1	1	0	1	0	0	0	0	0		0	0	0	0			1
	1	1			0			0		0	1	1	1	0	1	0		0	0	0	0	0	1			1	0	0	1	1							1
	1	1			0			1		0	0	0	1	1	1	1		1	0	1		0	1			1	0	0	0	0	0	1	0	1	0	1	1	0	1	1		1			0			0
	0	1			0			1		1	1	1	1	0	1	1		1	1	1		1	0			1	0	1	1	0	0	0	1	1	0	1	0		1	0	0	1	0	0	0
	0	1			0			0		0	0	0	1	1	1	1		1	1	1		0	1			0	0	0	0	1	1	1	0	1	0	0		0										0
	0	1			0			1		0	1	0	0	1	1	1		1	0	0		1	1			0	0	0	1	0	0	0	1	1	1	0	0	0	0	1		0	0	0	0			0
	1	1		0	0			0		1	0	1	1	1	1	0		1	0	0		0	1			1	1	0	0	0	0	1	1	0	1	1	1	1		1								1
	0	1		0	0			1		0	1	0	0	1	1	1		1	0	0		0	1			0	0	1		1	0	0	1	0	1	1				1	0							0
	0	1			0			1		1	0	1	1	1	1	0		1	1	1		1	0			0	0	0	0	0	1	1	0	1	0	1		0	1			1						0
	1	1			0			1		0	1	1	1	1	1	0		1	1			0	0			0	0	0	1	1							0	1	0	1	0	1	0	0	0			0
	0	1			1			0		1	0	1	1	1	1	0		1	1	1		0	1	0		1	1	0	0	0	1	1	1	1	0	0	0	0	1	1		1						1
	1	1			1			0	0	0	1	0	1	1	1	1		1	0	1		0	0			1	0	0	0	0							1		0	1	1
	0	1			0			1		0	1	1	1	1	1	1		1	0	1		1	1			1	0	1	0	0	1	1	1	1	1	1		0	1	1		0	0		0			1
	1	1	0	0	1			0		1	1	0	0	0	1	1												1	0	1	1	0	1	0	1	0		0	1						1
	0	0			0			1		0	1	1	0	1	1	1		1	1	0		0	1			0	0	1	1	0	1	0	1	1	1	0	1	0	1	1	1	1	0	0	0			1
	0	1			0			0		0	1	0	1	0	0	0		1	0	1		1	0			0	1	1	0	0	1	1	0	1	1	1	0											1
	0	1		0	0	0	0	0		0	1	1	1	1	1	1		1	0	0	0	0	1			0	0	0	1	0	0	1	1	0	1	1	1	0	0	1	0	1	0	0	0			1
	1	1			1			1		1	1	0	0	0	1	1		1	0	1		0	1			1	0	1	0	0									1						0			1
	1	1			0			0		0	1	1	0	0	1	1		1	0	0		0	0			1	0	1	1	1	1	1	1	0	0	1	1	0	1	1	0	1	1	0	0			0
	0	1			1			0		1	1	0	0	1	0	1		1	0	0		0	1			1	0	1	0	0	1	1	0	1	0	0	0	1	1						1
	0	1			0			1		1	1	1	0	0	1	0		1	1	1		1	1			0	1	0	0	0	1	0	0	0	0	0	1	0	1	0	0	1	1	0	0			0
	1	1			1			0		1	1	0	0	0	1	1		1	0	0		0	1			1	0	0	1	1							0	0	0						0			1
	0	0			0			1		0	1	0	1	0	1	1		1	0			1	0			1	0	0	0	1	1	1	0	1	0	0	0	0	1						0			1
	1	1			0			0		1	1	0	1	1	1	1		1	0	1		0	0			1	0	1	0	0	1	1	0	1	0	0		0	1	1	0	1	0	0	0			0
	0	1		0	0			0		0	1	1	0	0	1	1		1	0	0		1	0			1	0		0	0	1	0	0	0	0	1		0	1	1					0			1
	1	1			0			1	0	0	1	0	1	1	1	0		0	0	1		0	0			0		0	1	0	1	1	1	1	0	1	0	1							1			1
	0	1			0			1		1	1	1	0	0	1	1		1	0	0		1	1			0	1	0	0		1	1	0	1	0	0			1	0	0	1	0	0	0			1
	1	1			1			1		0	1	0	1	1	1	1		1	0	0	0	0	0			0	0	0	1	0	1	1	0	1	1	0	1	0	1	1		1			0			1
	0	1			0			1		0	1	1	1	0	0	0		0	1	1		1	1			1	0	0	0	0								0	1						0			1
	0	1			1			0	0	0	1	0	1	0	1	1		1	0	1		0	0			0	1	1		0	1	1	0	1	0	1	0	0	1	1	1	1	0	0	1			1
						0		0		1	0	1	1	1	1	1		1	1	1		1	1			1	0	1	0	0	1	1	1	1	1	0	0								0
	0	1			1			0		1	1	0	1	1	1	1		1	0	0		0	0		0	0	0	1	0	1	0	0	0	1	0	0	1	0	1	0	0	1	0	0	0			1
	1	1	0		0			1		0	1	0	1	1	1	0		1	1	1		1	0			0	0	0	0	0							0	1	1						0			1
	0	0		0	0	0		0		0	1	1	0	0	1	0		1	0	0		1	0			1	1	0	0	1	1	0	1	1	0	1		0	1	1	1	1	0	0	1			0
	1	1			1			1		1	1	1	1	1	1	1		1	1	0		0	0			1	1	0	1	1	0	0	1	0	1	0			1	1	0	1			1
	0	1			0			0		0	1	0	1	1	1	1		1	0	1	0	0	0			1	0		0	1							1	1							0			1
	1	1			1						1	1	1	1	1	1		1	0	0		0	1			1	1	1	0										1	1	0	1						0
	0	1			1			1		0	1	0	1	1	1	1		1	0	1		0	0			0	1	0	0	1	1	0	1	1	1	1	0	0	1	1	1				0
	0	0			0			0	0	1	0	1	0	1	0	1		0	0	0		0	0			0	0	1	1	0							0	0	1	1	0	0	0	0	1
	1	1			1			0		1	1	0	1	1	1	0		0	0	1		0	0			1	1	0	0	0	0	1	1	1	1	1	0	1							0			1
	0	1			0		0	1		0	0	1	1	0	1	0		1	0	0		1	0		0	0	0	1	0	1							0	0	0	1		0			0
	0	1	0		0	0		0		0	0	0	1	0	1	1		0	1	1	0	0	0			1	0	0	1	0	1	0	1	1	1	0	0	0	1	0	0	1	0	0	0			0
	0	1			0			0		1	1	0	1	0	1	1		1	1	1		0	1			0	1	0	0	1									1	1	0	1	0	0	0
	0	1		0	0			0		0	0	0	0	1	0	1		1	0	1		0	0			1	0	0	1	0	0	1	0	0	1	0	1	1										1
	0	1			0			0	0	1	0	0	0	0	1	0		1	0	1	0	0	0			1	0	0	0	0	0	1	0	0	0	0	0		0	0	0	0	0	1	0
	0	1			0			1	0	0	0	0	1	1	0	0		1	0	1		0	1			0	0	0	0	0	1	1	1	0	0	1		0	0	1		0			0			0
	1	1	0		0			0		0	1	0	0	0	1	1		1	0	0		0	0			0	1	0	1	1							1		1	1	1	1			0			0
	1	1			1		0	0		1	1	0	0	0	1	0		0	0	0		0	1			0	0	0	0	0	1	1	0	1	0	1		0							0			1
	0	1		0	0			1		0	1	0	0	0	1	0		1	0	1		0	1			0	0	1	1	1	1	1	1	1	1	1	0		0	0	0	0	0	0	0
	0	1			0			0		0	0	1	1	1	1	0		1	0	1	0	0	0			0	0		0	0								0							1			1
	1	1			0			0		1	1	0	0	0	1	0		1	0	1		1	0			0	1	1	0	1								0	0	0		0						1
	0	0			0			0		1	1	0	0	1	1	0		1	0	1		0	0			0	0	0	1	0	1	1	0	1	0	1	1		1	1	0	1	0	0	0
	1	1		0	1			1		0	1	1	0	0	1	1		1	0	1		0	0			0	1	0	0	0	1	0	1	1	1	0	0	0	1	0		1	0	0	1
	0	1			0			0		0	1	0	0	0	0	0		0	0	1		1	1			0	0	0	0	1							0	0							0			1
	0	1			0	0		0		1	0	0	1	1	1	0		1	0	0		1	0			1	0	0	1	0	1	0	1	0	0	1	0	1	0	1	0	0	0	1	0			1
	1	1			0			0	0	1	0	0	1	1	1	0		1	0	0	0	0	0			0	1	0	0	1	1	0	1	1	0	0	0	0	1						0
	0	1			0	0		1		0	0	0	0	1	1	0		1	1	0		1	1			0	0	1	1	0	1	1	1	1	0	0		0	0	1		0	0	0	0			1
	0	1			0		0	0		0	0	0	1	0	1	1		1	0	1		1	0	0		0	1	1	0	0	0	1	0	0	0	0	0	0	1	1		1		0	0			1
	1	1		0	1			0		1	0	1	0	0	1	0		0	0	0		0	0			0	0	1	0		1	0	1	1	1	0		0	1									1
	0	1	0	0	0			1	0	1	0	1	0	1	1	1		0	0	1		0	0			0	1	0	0	0	0	1	1	0	0	1		0	1	0	0	1	0	0	0			0
	0	0			1			0		1	1	0	1	1	1	0		1	0	1		0	0			0	0	1	0	1							0	0	1	1		0			0			1
	0	1			0			1		0	1	0	0	0	1	0		1	0	0		1	0			1	1	0	0	0	1	1	1	1	0	1		0	1	0	1	1	0	0				0
	0	0			0			0		1	0	1	0	0	1	0		0	1	0		0	1			0	1		1	1	0	1	1	0	0	1	0	0	1						0
	1	1			0		0	1		0	0	1	1	0	1	0		1	0	0		0	0			1	0	0	0	0									0	0	0	0	0	0	0			1
	1	1			1			1		0	1	0	0	1	1	1		0	0	1		0	0			0	0	1	1	0	1	0	1	1	1	0	0	0	1	1					0			0
	1	1		0	0			0		1	1	0	1	1	1	0		1	0	1		0	0			1	1	1	0	1							1	1	0	1	1	0	0	0	1
	0	1			0						1	1	0	1	0	0		1	1	0		1	0			1	1	1	1	0	1	0	1	1	0	1	0	1	1	1		1			1			1
	1	1			1			1		1	1	1	0	1	1	0		1	1	1		0	0			0	0	0	1	1							1	0	1	1	0	1	0	0	0
	0	1			0			0		0	1	1	1	0	1	0		1	1	0		1	1			1	0	1	1	1	1	1	1	1	0	1	0								1			1
	0	1			0		0	0		0	1	0	1	1	1	1		1	0	1		1	0		0	0	0	0	0	1							1	0	0	1	0	0	0	1	0
	0	1		0	0			0	0	1	1	1	0	1	1	1		1	1	0		0	0			1	1	0	1	0								0							0			1
	1	1			1			0		1	0	0	1	1	1	1		1	0	0		1	1			1	0	1	1	1	1	1	1	1	0	1		0	1	1	0	1	0	0	1
	0	1			0			1		1	1	1	0	1	1	1		1	0	1		0	1			0	0	1		0	1	1	1	1	1	1	0	1	1	1	1	1	0	1	1
	1	1			0		0	1		1	1	0	1	0	1	1		1	0	0		0	1			1	0	1	1	1	0	0	0	1	1	0	1	0	1	1	0	1	0	0	0			1
	1	1			0	0		1		1	0	0	1	1	1	0		0	1	0		0	0	0		1	1	0	0	1									1	1	0	1	1	0	0			1
	1	1			1			0		0	1	1	1	1	1	0		1	0	1		1	0			0	0	1	1	1	1	0	1	1	0	1	0	0	1	1	0	1	0	0	1			0
								1		1	0	1	0	1	1	0		1	1	1	0	1	1			1	1			0	1	1	1	1	0	0	0	0	0	0	0	1	1	0
	1	1	0	0	0			1		0	1	1	1	1	1	0		1	0	1		0	0			0	1	1	1		1	1	0	1	0	0		0	1	1	0	1	0	1				1
	0	1			0			0		0	1	1	1	1	1	1							1				1	0	1	1	1	1	1	1	0	0	0		1	0		0	0	0				1
	1	1			0			1		1	1	0	1	0	1	1		1	1	1		1	1			1	1	1	0	0							1	1	1	1	0	1	1					1
	1	1			0			0		0	1	1	1	1	0	1		1	1	1		1	0			1	1	0	1	1	1	1	1	0	0	0		0		0		1	0					1
	0	1			0			1		0								1	1	0		0	1			0	1	1	0	1							0		1	1	0	0	0	0
	1	0			0		0	1		0	1	1	0	1	1	1		1	1	1		1	1			1	0	1	1	0	0	1	0	1	0	1	1	1	0		1	1	0					1
	1	1			1			1		0	1	0	1	1	1	1		1	1	1		1	0			0	1	0	1	0							0	0	0	0	0		0	0
	0	1			0			1	0	0	0	1	1	1	1	1		1	1	0		0	1			1	1	1	0	0	1	0	1	1	0	1		0		0	0	1	0					0
	1	1		0	0			1		0	1	0	0	1	0	0		1	1	1		1	1			1	1	1	0	1							0		1			0
	1	1			0	0		0		0	1	1	1	0	1	1		1	0	0		0	1			0	0	1	1	1	1	1	0	1	1	1	0	0	0	0	0		0	0				1
	0	1			0			1	0	0	0	1	1	1	0	1		1	1	1	0	1	0		0	1	1	0	0	0	1	1	1	0	1	0	1	0	1	1	0	1		1
								1		0	1	1	0	1	1	1		1	1	0		0	1	0		1	1	1	1	1	1	1	1	1	0	1	0	1		0	0	0	0					1
	0	1			0			0		0	1	0	1	1	1	0		1	1	1		1	1			0	1		1	1									0	1	0	1		0				1
	0	1			0			0		0	0	1	1	1	1	1		1	0	1		1	1			1	0	1	1	1	1	0	1	1	0	1	0	0	1			1	0					1
	1	1			0			1		0	1	1	0	1	1	1		1	1	0		1	1			1	1	0	0	0							1	0	0	1	1		0
	1	1			1			0		0	1	1	1	0	1	1		1	1	1		1	0	0		0	0	1	0	1	0	1	0	1	1	0		0	1	1	0	0	1	0				1
	0	1			0		0	1		0	0	1	1	1	1	0		1	1	0		0	1			1	1	1	1	0							0	0				1
	1	1		0	0						1	0	0	1	1	1		1	0	1		1	0			1	0	0	1	1							1	0	0	1		1	0					0
	0	0			0	0		1		0	1	1	1	1	1	0		1	0	1		1	1			1	1	1	1	1	0	1	0	1	1	1	0	0	1	0	0	1		0
								0		0	1	1	0	1	1	1		1	1	0	0	1	1			1	0		0	0	1	1	0	1	0	1		1				1
	1	1			0	0		1		0	1	0	1	1	0	1		1	1	1		1	1			0	1	1	1	0	0	1	1	1	0	0	0	1	0	1		0	0	0				0
	1	1			0			1		0	1	1	1	0	1	1		1	0	0		1	0			1	1	0	1	1							1	0	1	1	0	1						1
	1	1			0			1		0	1	0	1	1	1	1		1	1	1	0	0	1			1	0	1	1	0							0	0		1	0			0				0
	0	1			0			0		0	1	1	0	1	1	0		1	1	1		1	1			1	1	1	0	1	0	1	1	1	0	0	0		1	0		0	0
	1	1			0			1		0	1	1	1	1	1	1									0	0	1	0	1	1	1	0	1	1		1	0	0	1	1	1	1		0
	1	1			1			0		0	1	1	1	1	1	0		1	1	0		0	1			1	0	1	1	1							0	0	1	1		1	0	1				0
	0	0			0			1		0	1	1	1	0	1	1		1	1	1		1	1	0		1	1	1	0	1	1	1	1	1	1	1			0	1		1		0				0
	1	1			0			1		0	1	1	1	1	1	1		1	0	1		1	1			0	1	0	1	0							1		1			1	1
								0		0	1	1	1	1	1	0		1	1	0		0	0			1	0	1	1	1	1	0	1	1	0	0		0	0	0	0	1		0				1
	0	1			0			1	0	0	1	1	0	1	1	1		1	1	1		1	1			1	1	1	0	0							0	0	0	1		0	0	1
	1	1		0	0			1		0	0	1	1	0	1	1		1	1	1		1	1			1	1	0	1		1	0	1	1	0	0	0	1		0	0		0	0				0
	1	1			0			0		0	1	0	1	0	1	1		1	0	1		1	0			1	0	1	0	1							1		1	1	0	0	1	0
	1	1		0	0			1		0	0	0	1	1	0	1		1	1	0		0	1			1	1	1	0	1	1	0	1	1	1	0		0	0	1								1
	0	1			0		0	1		1	1	1	1	1	1	1		1	1	1		1	1			0	0		1	1	1	0	1	0	0	0		0	1	0	0	1	0	0
	1	1			0			1		0	1	1	0	0	1	0									0	1	1	0	1	0	1	1	1	1	0	0	0		1	1		1	1					1
	1	1			0						1	1	1	1	1	1		1	1	1		1	1			1	1	1	0	1	1	0	1	0	0	0	0	0	0	0	0	0	0	0				1
	0	1			0			1		1	1	1	1	1	1	1		1	0	1		1	1			1	0	1	1	0	0	0	0	1	0	1	1	0		1	0	1		0				1
	1	1	0		0			1		1	1	1	0	1	1	1		1	1	1	0	0	0			1	1	0	1	0	1	0	1	1	0	0	1		1	1		1	1					1
	0	1		0	0			1		0	1	0	1	1	1	0		1	1	0		1	1	0		1	1	1	0	1	1	1	0	1	0	1	0	1	1	1		0	0	0				0
	1	0			0			0		1	1	1	1	0	1	1		1	1	1		1	1			0		1	0	0								0		0								1
	0	1			0			0		1	1	1	1	1	1	1		0	1	1		1	0			1	1	0	1	1	0	1	1	0	0	1	1	0	0		0	1	0	0				1
	0	1			0	0		1		0	1	0	1	1	0	1		1	0	1		1	1			1	1	1	0	1	0	1	0	0	1	1	0		0	0		1	0	0
	1	1			0			1		1	1	1	1	1	1	1		1	1	0		0	1			1	1	1	1	1							0	1		1	0							0
	0	1			0			0		0	1	1	0	1	0	1		1	1	1		1	0	0		1	0	1	1	1	1	1	1	1	1	1	0	0	0	1		0	0	0				0
	0	1			0													1	0	1		1	1			1	1	0	0	1	1	1	1	0	0	1			1	1		0
	0	0		0	1			1		1	0	1	1	1	1	1		1	1	0		0	1			0	0	1	1	0	1	1	1	1	0	1	0	0		0		1	0					1
	1	1			0			1	0	0	1	1	1	1	0	0		1	1	1		1	1			1	1	0	1	1	1	1	1	1	1	0	0		1	1		0	0	1				1
	1	1			0			1		1	0	1	1	0	1	1		1	0	1		0	0			1	0		1	1	1	0	1	1	1	1	0	0	1		0	1						1
	0	1			0						1	1	1	1	0	1		1	1	0		1	1			0	1	1	1	0							1	0	1	0		1	0	1				1
	1	1			0			0		0	1	1	0	1	1	0		1	1	1		1	1			1	1	0	0	1	0	1	1	0	0	0	0	0	1	0		1	0					1
	1	1	0		0			0		1	1	1	1	1	1	1		0	1	1		1	0			1	0	1	1	1	1	1	0	1	0	1	1	1		1	0	1		0
	1	1			0			1		0	1	1	1	1	1	0		1	1	0		0	1			1	1	0	0	1	1	1	1	1	0	0	0	0	1	1			0					0
	1	1			0		0	1		1	1	0	1	1	1	1		1	1	1		1	1			1	0	1	1								0					0	0					1
	0	1			0			1		1	0	1	1	1	1	1		1	0	1		1	1		0	1	1	1	1	1	1	0	0	1	0	0	0	0	0	1		1		0				1
	1	1			0			0		1	1	1	1	1	1	1		1	1	0		0	1			0		0	0	1							0	0	0	0	0	0		0
	1	1			0			1		0	1	1	0	0	1	1		1	1	1		1	0	0		1	1	1	1	0	1	0	0	1	0	0	0	0	1			1	0					1
	1	1	0		1			0		1	1	0	1	1	1	1		1	1	0	0	1	1			1	1	1	0	1							0	0		1	0	0	0	0
	1	1			0			1	0	1	0	1	0	1	1	0		1	1	1		0	1			1	1	1	0	0	1	1	1	1	0	0	0	0	1	0		1		0				1
	1	1		0	0			0		1	1	1	1	1	1	1		1	1	1		1	0			0	0	0	0	1	1	1	0	1	0	0	1			1		1		1
	0	0			1			1		0	1	1	1	0	0	1		1	0	0		0	1			1	1	1	1	1	1	1	0	0	0	1		0	1	0	0		0					1
	1	1			0						1	0	1	1	1	0		1	1	1		1	0			1	0		0	0	0	1	0	0	1	0	0	0	1	1	0	1		0				1
	1	1			0			0		1	1	1	1	1	1	1		1	1	1	0	1	1			1	0	0	1	1	0	1	1	1	1	0	1	0	1	1		1	0					1
	1	1			0			1		1	1	1	0	1	1	1		1	1	1		1	1			1	1	1	0	0	1	1	0	1	1	1	0	0	0	1	1	1	0					0
	1	1			0			1		0	1	1	1	0	1	1		1	1	1		1	1			0	1	1	1	1							0	0	1	0	1	0		1				0
	0	1			0			1		1	1	0	1	1	1	0		1	1	0		0	1			1	0	1	1	1	0	1	1	0	0	1		1		0	0	1						1
	1	1			0			0		1	1	1	1	1	1	1		1	0	1		1	1			1	1		1	0							1	0	1	1		0	0	0
	1	1			0			1		0	1	1	0	1	1	1		0	1	1		1	0			1	1	0	0	1	1	0	1	1	0	1	0	1	1			1	0					0
	1	1			0			1		1	0	1	1	1	1	1		1	1	0		0	1	0		0	0	0	1	1							0		1	0		1		0
	0	1			0			1		1	1	1	0	1	1	0		1	1	1		1	1			1	1	1	1	1	1	1	0	1	0	1	0	1		0	0	1	0					1
	1	1			0			1		0	1	0	1	1	1	1		1	1	1		1	1			1	1	1	0	0							1	0	0	1	0	0		0
	1	1			0			1		1				1				1	1	0		0	0		0	1	0	1	1	0							0	1	0	1		1	1					1
	0	1			0			1		1	1	1	1	1	1	1		1	0	1		1	1			0	1	0	1	1	1	1	1	1	0	1	0	0	1	1		1
	1	1			0			1		1	1	1	0	1	1	1		1	1	1		1	1			1	1	1	0	1	1	1	1	1	0	0	1	0	1	0	0	0	0	0
	0	1			0			1	0	0	1	0	1	0	1	0		1	1	1		1	1			1	0	0	0	0								0	1	1		0						1
	1	1			0			1		0	1	1	1	1	1	1		1	1	0		0	0			0	1	1	1	1	1	1	1	0	0	0	0	0	1	0		0	0	0				1
	0	1	0	0	0		0	0		1	1	1	0	1	1	1		1	0	1		1	1			1	1	1	0	1								0	1	0	0	1	0	0
	1	0		0	0			1		1	1	1	1	1	0	1		1	1	0		0	1	0		1	1	0	1	1	0	0	0	0	1	0		1	0	1		1						1
	1	1			1			0		0	1	1	1	1	1	1		1	1	1		1	1			1	0	1	1	1							1	1	1	1		0	0	1
	0	1	0		0	0		1		0	0	0	1	0	1	1		1	1	0		0	1			0	1	1	0	1	1	0	1	1	0	1	0	1	0	0		1						0
	0	1			0			0		1	1	1	0	1	1	1		1	0	1		1	1			1	1	1	1	0	1	1	1	0	1	0	0	0	1	1	0	0	1	0
	1	1			0			0		1	1	1	1	1	1	0		1	1	1		1	0			1	0	0	0	0	1	1	0	1	1	0	0	0	0			1	0					1
	0	1			0						1	1	1	1	1	1		1	1	0		1	1			1	1		1	1	1	1	1	1	1	0	0	0		1	0	0		0				1
	0	1			1			1	0	1	1	0	1	1	1	1		1	0	1		0	1			1	0	1	0	1	1	0	1	1	0	1				1		1	0					1
	1	1			0						1	1	1	1	1	1		1	1	0		0	1			0	1	0	1	0	1	1	0	1	0	0	0	1	0	1	0	0	0	0				1
	1	1			0			0		0	1	1	0	1	1	1		1	1	1		1	0	0		1	1	1	0	1	0	1	1	0	0	0	0	0	1	1	0		0	0				1
	1	1		0	0			1		1	1	1	1	1	1	1		1	0	1		1	1			1	0	1	1	0							0	1				1						1
	1	1			0			1		1	1	1	1	1	1	0		1	1	0		0	1			1	1	0		1	1	1	1	1	0	0	0	1	1	1	0	0	0	1				0
	1	1			1			1		0	1	0	0	1	1	1		0	1	0		1	1			1	0	1	1	0							0	0	1	0		1	0	1
	1	1			0			1		1	1	1	1	0	0	1		1	1	1		1	0			1	1	1	1	1							0	1	1	0	0		0					0
	1	0			0			1	0	0	1	1	1	1	1	1		1	1	1		1	1			0	1	0	1	1	1	1	1	1	0	1	1	0				1	0
	1	1			0			1		1	1	1	0	1	1	1		1	0	0		0	0	0		1	0	1	0	1							0		0	0		1
	1	1			0			1		1	1	1	1	1	1	1		1	1	1		1	1			1	1		0	0	1	1	1	0	0	1	1		1	1	0	1	0	0				1
	0	1			0			0		1	1	1	1	1	1	0		1	1	1		1	1			0		1	0	1					0	1	0	0				1	0
	1	1	0		0			1		1	0	1	1	1	1	0		1	0	0		0	1			1	1	0	1	0	1	1	0	1	0	1	1	1	1	1	0	1		1				1
	1	1			0			1		0	1	0	1	0	1	1		1	1	1		1	1			1	1	1	0	1							0	0	0			1	0
	1	1			0		0	0		0	1	0	0	1	1	1		1	1	1		1	1			0	0	1	1	0	1	1	1	1	1	0	1	1	1	0				0				0
	0	1		0	0			0		1	1	1	1	1	1	1				1							1	1	0	1	1	1	1	1	0	1		0	0	0	0	1	0	0
	0	1			1			1	0	0	1	1	1	1	1	1		1	1	1		1	1			0	1	0	1	1	0	1	0	0	0	0	0	0	1									1
	1	1			0			1	0	1	1	1	0	1	1	1		1	1	0		0	1			1	1	1	1	1							0	0		1		1	0					1
	0	1			0			1		0	1	1	1	1	1	0		1	0	1		1	0			1	1	1	0	0	1	1	1	1	1	0	1	0	1	1	0	0		0				0
	1	1			0	0		1		1	1	0	0	1	1	1		1	1	1	0	1	1			1	0	1	0	1								0	1	0	0	1		0
	1	1			0			1	0	1	1	1	1	0	1	1		1	1	0		1	1			1	1		1	1	1	1	1	1	0	1	0	0	1				0					1
	1	1		0	0			1		1	1	1	1	1	1	0		1	0	1		1	1			0	1	0	1	1							0	1	0	1	0	1	0	1
	1	1			0			1		1	1	1	0	1	0	1		1	1	1		1	1			0	1	1	1	0	1	1	1	1	0	1	0	1	1			1						1
	1	1			0			0		1	1	1	1	1	1	0		1	1	0		0	0			1	1	1	0	1	1	1	0	1	0	0	0	0		1			0
	1	1			0			1		0	1	0	1	1	1	1		1	0	1		1	1	0		1	0	1	1	1	1	0	1	1	0	1	1	1	1	0	0	1	0	0				0
	0	1			0			0		0	1	1	1	1	1	0		0	1	1		1	1			1	1	1	1	0	0	0	1	0	1	0		0	0	1		1						1
	1	1			0			1		0	0	1	1	0	1	1		1	1	1		1	1			1	1	0	0	1	1	1	1	1	0	0	0		0				0	0				1
							0	1		1	1	1	0	1	1	1		1	1	0		0	1			0	0	1	1	1	1	0	1	1	0	0	1	0		0	0	1		1				0
	1	1			0			1		1	1	1	1	1	1	0		1	1	1		1	1			1	1	1	1	0	1	1	1	1	0	1	0	0		1	1	0		0
	0	1		0	0			0		0	1	1	0	1	1	1		1	1	1		1	1			1	1	0	0	1							0	0	0	1	1	1	0	0				1
								1	0	1	1	1	1	1	1	1		1	0	0		0	0			1	1	1	1	1	0	1	0	0	0	0	0	0	1	1	0	1	0	0				1
	1	0			0		0	1		0	1	0	1	1	1	1		1	0	1		1	1			1	1	1	0	1							0	0		0		1
	0	1			0			0		0	1	1	1	1	1	1		1	1	0		1	1			1	0	1	1	0	0	1	1	1	0	1	1	0	0	0	1	1	0	0				0
	1	1			0			1	0	1	1	1	0	1	1	1		1	1	0		1	1			0	1	1	1	1							0	0	1	0	0	0	0	0
	1	1	0		0			1		0	1	1	1	1	1	0		1	0	1		1	1			1	1	1	1	1	1	1	1	1	1	0		0	0				0					0
	1	1			0			1		0	1	1	1	1	1	1		1	1	1		1	0			1	0	0	0	1	1	0	1	1	0	1	0	1	1	1	1	1	0	0
	0	0			1						1	0	0	1	1	1		1	1	1		1	1	0		1	1		1	1	0	1	0	0	0	0	1	0		0		1						1
	1	1			0			1		1	1	1	1	1	1	1		1	1	0		0	1			1	1	1	1	1	1	1	1	1	0	1		0	0	1	0		0					0
	1	1			0			1		1	1	1	1	0	1	1		1	1	1		1	1			1	0	0	1	1	1	1	1	1	1	1	0	1	1	1		1	0					0
	1	1			0	0		1		1	1	1	1	1	1	1		1	1	1		1	1			0	1	1	0								1	1		1	0	1		1				1
	1	1			0			1		1	1	1	0	1	0	0		1	1	1		1	0			1	1	1	1	1							0		0	0		1	0					1
	0	1			0			0		1	0	1	1	0	1	1		1	1	1		0	1			1	1	0	0	1	1	0	1	1	1	0	0	0	1					0
	1	1			0			1		0	1	1	0	1	1	1		1	0	1		1	1			1	1	1	1	0	1	1	1	0	1	1	0			1	0	1
	1	1			0			0		0	1	0	1	1	1	1		1	1	0		1	0		0	1	0	1	1	1							1	0	1	0	0			0
	0	1		0	0			1		1	1	1	1	1	1	1		1	1	1		1	1			1	1	1	1	0	1	1	1	1	0	0	0	0	1			1	0					1
	1	1	0		0			1		1	1	1	0	0	1	1		1	0	0	0	1	1	0		0	1	0	0	1	1	1	1	1	0	1	0		1	1		1
								1		0	1	1	1	1	1	0		1	1	1		1	0			1	1	1	1	1	1	0	0	1	0	0	0	0	0	0	0	0	0	0				1
	0	1			0			0		0								1	1	1		1	1			1	0	1	1	1	1	1	1	1	0	0	0	1	1									1
	1	1			0			0		0	1	1	1	1	1	1		1	1	0		0	1			0	1	0	0	0							0		0	1	0	1	0	0				1
	1	0			0			0		1	1	1	0	1	1	1		1	1	1		1	0			1	1	1	1	1	1	1	0	1	0	1	1	0	0	1		1						1
	0	1			0		0	0		0	1	1	1	1	1	1		1	1	0		0	1			0	1	1	0	1	0	1	1	0	0	0		1		1	0
	0	1			0			1		0	1	1	1	1	0	1		1	0	1		1	1			1	1	1	1	1	1	1	0	1	1	0	0	0	1			0	0					0
	1	1			1			1		0	1	0	0	1	1	1		1	1	1		1	0			1	0	1	0	1							0			1	0			0				0
	1	1			0			0		0	1	1	1	0	0	0		1	1	0		0	1			1	1	1	1	0							1	0	1	1		1	0
	1	0			0			1		1	1	1	1	1	1	1		1	1	1		1	1	0		0	1	0	1	1	1	0	1	1	0	1		0	1	1	1	1		0
	1	1			0			0		0	1	0	1	1	1	1		1	1	1		1	1			1	1	1	0	1	0	1	1	0	0	0		0	0	1		1		0
	0	1			0			0		0	1	1	1	1	1	1		1	1	0		1	1			0	0	1	0	1	1	1	0	1	0	1	0					1						1
	1	1		0	0			1		0	1	1	1	1	0	1		1	0	1		0	1			1		0	0	1	1	1	1	1	0	0	0	0	1	1	1		0	0				0
	1	1			0			0		0	1	1	1	1	1	1		1	1	0		1	1			0	1	1	1	0	1	0	0	1	0	1	1		1			0	0	1
	1	1			0					1	0	1	0	0	1	1		1	1	1		1	0			1	1	1	0	1							1	0		1	0	1		0				1
	1	1			0			1		0	1	1	1	1	1	1		1	0	1	0	1	1			1	0	0	0	0	0	1	1	0	0	1	0	1	0			1	0					1
	1	1			0	0		1		0	0	0	1	1	1	0		1	1	1		1	1			1	1	1	1	0							0	0	0	1	0	1		0
	0	1			0			1		1	1	1	1	1	1	1		1	1	0		1	1			0	1	1	1	0	1	0	1	1	1	0	0	0				1	0					0
	1	1	0		0			1		1	1	1	1	1	1	1		1	1	1		0	1	0		1	0	1	0	1	1	1	1	1	0	1	1	0	0	0	0	0		0
								1		1	1	0	1	1	1	0		1	0	1		1	1			1	1	0	1		0	1	1	0	0	0	0	0	1	0		1	0					1
	1	1			0		0	0		0	1	1	0	0	1	1		1	1	1	0	1	0			0	0	1	1	1	1	1	0	1	0	1	1	0		0				1				0
								1		0	1	1	1	1	0	1		1	1	1		1	1		0	1	1	0	0	1	1	1	1	0	0	0	1	1	1	1	0	1	1	0				0
	1	1			0	0		0		1	0	1	1	1	1	1											1	1	1	1							0		1	1		0
	0	1			1			0		0	0	1	0	1	1	1		1	0	0		1	0			1	0	1	0	0	1	1	1	1	0	1	0	0	1			1	1					1
	1	1			0			1		1	1	1	1	1	1	1		0	1	1		1	1			1	1	0	1	1	1	0	0	1	0	1	0	0	1	0	0	1		0
	1	1			0			1		0	1	1	1	1	1	1		1	1	0		0	1			1		1	0	1	1	1	1	1	0	0	0	0		1		1						1
	1	0			0			1		1	1	1	1	1	1	0		1	1	1		1	1			0	1	0	1	1							1	1	1		1	1	0	1				1
	1	1			0			0		1	1	1	1	1	1	1											1	1	1	1	1	0	1	1	1	0	0	0		1	1	1		0				1
	0	1	0		0			1		0	1	1	0	1	1	0		1	1	0		1	1	0		1	1	1	0	1	0	1	1	0	0	0	0	1	0	1		1
	1	1			0			1		1	1	0	1	1	1	1		1	0	0		0	1			1		1	1	0	1	0	0	0	0	0	0	0	0	0	0		1	0				1
	1	1		0	0	0		1		0	1	1	1	0	0	1		1	1	1		1	0			1	1	1	0	1	1	1	1	1	0	0	0		1	0		1		1
	1	1			0		0	1		1	1	1	1	1	1	0		1	1	0	0	1	1			0	1	1	1	1							1	1		1	1			0				1
											1	0	1	0	1	0		1	0	1		1	1	0		1	0	0	0	1	1	1	1	1	0	1		1	1	1	0	1	1	0				1
											0	1	0	1	1	1		0	0	0		0	1			0	1	1	0	0							0	0	1	0
											1	0	1	1	1	0		1	1	1		1	0			1	1	0	1	1	1	0	1	1	1	1	0	0	1	1	0	1	0	0				1
[truncated: 24 more columns]
